# Supplementary material for: Gate induced charge transfer and hysteresis enlargement in MoS2/GeSe2 vertical heterostructures
Source: Royal Society of Chemistry journal article supplement (doi:10.1039/d1tc01824h), 2021-01-01
Supplement: d1tc01824h1.pdf [file d1tc01824h1.pdf]

## Supporting Information

Jiadong Yao<sup>1</sup>, Wenxuan Guo<sup>1</sup>, Yali Liu<sup>1</sup>, Xinyue Niu<sup>1</sup>, Mengge Li<sup>1</sup>, Xiaoxiang Wu<sup>1</sup>, Ying Yu<sup>1</sup>, Tianjian Ou<sup>1</sup>, Jian Sha<sup>1</sup> and Yewu Wang<sup>1,2\*</sup>

<sup>1</sup>*Department of Physics, Zhejiang Province Key Laboratory of Quantum Technology and Devices & State Key Laboratory of Silicon Materials, Zhejiang University, Hangzhou 310027, P. R. China.*

<sup>2</sup>*Collaborative Innovation Centre of Advanced Microstructures, Nanjing University, Nanjing 210093, P. R. China*

### Section 1: The characterizations of device

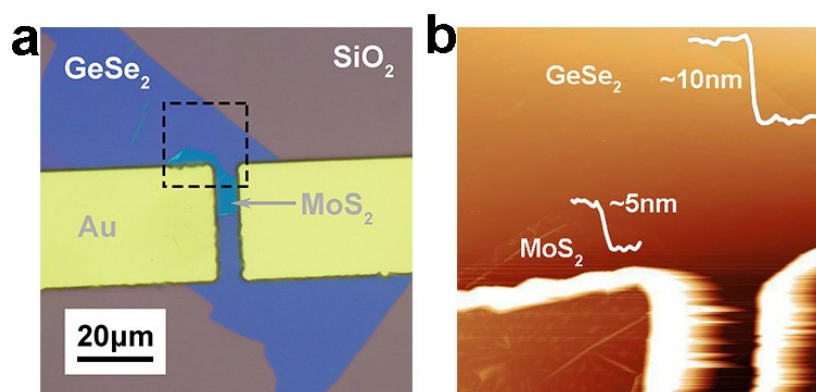

**Figure S1.** (a) Optical image of the device based on MoS<sub>2</sub>/GeSe<sub>2</sub> van der Waals heterojunction. (b) Atomic force microscope image of the area marked with dashed rectangle in (a). From the scan lines (white), the thickness of MoS<sub>2</sub> and GeSe<sub>2</sub> are 5 nm and 10 nm respectively.

### Section 2: Calculation of time constants

Here, we used a simple model<sup>1</sup> to estimate the time scale of charge transfer under the perpendicular gate voltage. When the back gate is switched from 0 V to a strong enough positive gate (for example, +80 V) directly, the band of GeSe<sub>2</sub> is tilted and a triangular barrier is formed. At this moment, the electrons in the MoS<sub>2</sub> channel is

\* To whom correspondence should be addressed. E-mail: [yewuwang@zju.edu.cn](mailto:yewuwang@zju.edu.cn).

possible to transfer over the barrier under the effect of gate induced electric field. The change of 2D carrier density  $n$  is deduced by the equation below

$$dn = T n_{3D} v dt \quad (1)$$

where  $T$  is the transmission coefficient of electrons over the barrier,  $n_{3D}$  is the 3D density of electrons in the MoS<sub>2</sub> channel and  $v$  is the velocity of electrons. The relationship between  $n_{3D}$  and  $n$  is that  $n_{3D} = n/D$ , where  $D$  is the thickness of MoS<sub>2</sub> channel. Therefore, the time constant of this exponential decay could be obtained to be

$$\tau = \frac{D}{v T} \quad (2)$$

The velocity  $v$  could be obtained by  $v = \mu E$ , where  $\mu$  is the mobility and  $E$  is the gate induced electric field. First, the mobility is calculated from the transfer curve with the formula below

$$\mu = \frac{dI_{ds} L}{dV_g W V_{ds} C} \quad (3)$$

Where  $L$  and  $W$  are the length and width of the device,  $C$  is the total capacitance of GeSe<sub>2</sub> and SiO<sub>2</sub> layer in parallel. The mobility is obtained to be 18.4 cm<sup>2</sup>V<sup>-1</sup>s<sup>-1</sup> according to the data in the Figure 2a in the main text. The electric field  $E$  in the MoS<sub>2</sub> channel is calculated with the relation  $E \varepsilon = E_I \varepsilon_I$ , where the electric field  $E_I$  in the GeSe<sub>2</sub> layer under the gate voltage  $V_g$  can be obtained using the Eq. (1) in the main text and the dielectric constants of MoS<sub>2</sub> and GeSe<sub>2</sub> are  $\varepsilon = 12.8$  and  $\varepsilon_I = 7.0$ .

For the transmission coefficient  $T$  of electrons over the barrier, calculation based on thermal emission or Fowler-Nordheim tunneling is performed. For thermal emission, there is

$$T_{TE} = e^{-\frac{U}{k_B T}} \quad (4)$$

Where the  $U$  is the height of barrier seen by electrons and equals to the conduction band offset here,  $k_B$  is the Boltzmann constant and  $T$  is the temperature. So  $T_{TE} = 9.27 \times 10^{-16}$  at the room temperature  $T = 300\text{K}$ . For Fowler-Nordheim tunneling, the transmission coefficient could be found<sup>2</sup>

$$T_{FN} = \exp \left( -\frac{4}{3} \sqrt{\frac{2m^*}{(h/2\pi)^2}} \frac{(U - \varepsilon)^{3/2}}{eE_1} \right) \quad (5)$$

Where  $U$  is the barrier height,  $m^*=0.6m_0$ <sup>3</sup> is the effective mass of electron,  $h$  is the Plank constant,  $E_1$  is the electric field of tunneling layer (GeSe<sub>2</sub>) and  $\varepsilon$  is the energy of electrons which is much less than the barrier height here. In the case of  $V_g = +80$  V,  $T_{FN} = 6.27 \times 10^{-14}$ . Finally, we obtained the estimate of the time constant at  $V_g = +80$  V

$$\tau_{TE} = 37s \quad (6)$$

And

$$\tau_{FN} = 0.5s \quad (7)$$

### Section 3: The performance of the memory device

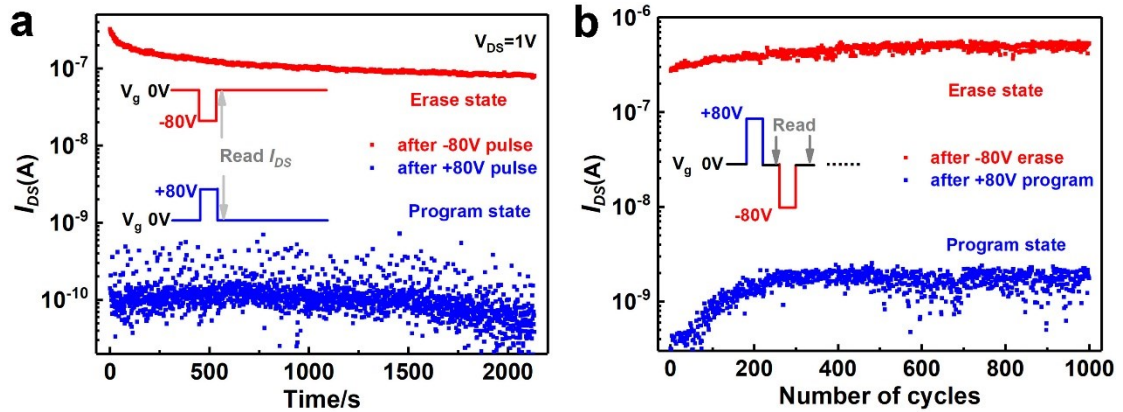

**Figure S2.** (a) The stability of the two-resistance state. The gate voltage  $V_g$  is biased to +80 V (-80 V) first and then reset to 0 V, the time dependence of current in the two states is recorded. (b) Cycle robustness of the device. The  $V_g$  is biased to +80 V first so that the device is set to the program state, and after the  $V_g$  is reset to 0 V the current is read to confirm the resistance. Then, the  $V_g$  is biased to -80 V to set the device to erase state, the current is read again to confirm this resistance after  $V_g$  returns to 0 V. The cycle is repeated for thousands of times to test the robustness.

### References

- <sup>1</sup>A. S. Kumar, M. Wang, Y. Li, R. Fujita, and X. P. A. Gao, ACS Appl. Mater. Inter, **12**(41), 46854 (2020).
- <sup>2</sup>M. Depas, B. Vermeire, P. W. Mertens, R. L. Vanmeirhaeghe, and M. M. Heyns, Solid-State Electron., **38**(8), 1465 (1995).
- <sup>3</sup>K. F. Mak, C. Lee, J. Hone, J. Shan, and T. F. Heinz, Phys. Rev. Lett., **105**(13), 136805

(2010).
